# Supplementary material
Source: MDPI journal article supplement (https://www.mdpi.com/2073-4395/10/4/467)
Supplement: s1 [file s1]

## Sheet: Supplementary data S1
Supplementary data S1. Average values of the phenotypic evaluation of the two parents (S. melongena AN-S-26 and S. incanum MM577), the interspecific hybrid and the 16 ILs in open field and greenhouse
	Open field																			Greenhouse
	Plant descriptors				Leaf descriptors					Flower descriptors				Fruit descriptors						Plant descriptors				Leaf descriptors					Flower descriptors				Fruit descriptors
	PH	SD1	SD5	SP	LCC	LBL	LSS	LPU	LPL	CD	PL	SL	FLCP	FCL	FPL	TY	FW			PH	SD1	SD5	SP	LCC	LBL	LSS	LPU	LPL	CD	PL	SL	FLCP	FCL	FPL	TY	FW
SMI_1.1	44.92	1.25	1.61	0	53.94	5	1	0	0	4.88	2.31	0.23	1.2	6.68	6.13	2714.2	83.65		SMI_1.1	50.84	1.32	1.79	0	49.95	5	1	0	0	5.35	2.06	0.18	3	6.62	5.54	250.25	48.41
SMI_1.3	48.46	1.13	1.67	0	55.97	5	1	0	0	4.92	1.83	0.19	0.6	5.79	6.37	2327.2	75.31		SMI_1.3	50.46	1.19	1.67	0	50.13	5	1	0	0	5.06	1.97	0.23	2	6.49	5.37	403.25	42.59
SMI_2.4	39.28	1.33	2.25	0	54.34	5	1	0	0	4.91	2.22	0.17	0.6	4.81	4.89	886.2	44.2		SMI_2.4	49.76	1.23	1.72	0	52.4	5	1	0	0	5.45	2.4	0.12	0.2	4.87	5.05	139	39.3
SMI_3.1	37.88	1.37	2.04	0	50.57	5	1	0	0	4.87	2.47	0.1	1.8	5.83	6.63	2294.8	79.63		SMI_3.1	43.26	1.22	1.72	0	51.88	5	1	0	0	5.31	2.99	0.1	2.4	6.44	6.3	363.5	47.45
SMI_3.5	43.94	1.35	1.9	0	50.7	5	1	0	0	4.59	2.44	0.23	0	6.5	7.17	1872	91.24		SMI_3.5	64.8	1.48	1.85	0	48.33	5	1	0	0	5.17	3.23	0.21	3	5.96	5.41	434.75	87.16
SMI_3.6	44.16	1.22	1.69	0	53.32	5	1	0	0	4.27	2.44	0.24	0	6.17	7.85	2066.6	92.52		SMI_3.6	61.7	1.31	1.64	0	49.57	5	1	0	0	5.28	2	0.21	0	6.25	6.47	821.2	82.42
SMI_4.1	41.16	1.18	1.37	0	50.38	5	1	0	0	4.42	2.47	0.34	0	5.49	4.91	1284.2	82.23		SMI_4.1	56.32	1.15	1.48	0	41.94	5	1	0	0	4.96	2.89	0.33	0.2	5.27	4.78	144.4	51.67
SMI_4.3	46.96	1.22	1.47	0	49.37	5	1	0	0	4.42	2.41	0.1	0	6.48	6.82	970.2	80.92		SMI_4.3	60.44	1.15	1.52	0	48.12	5	1	0	0	4.99	2.66	0.1	1.2	6.68	5.82	684.6	68.49
SMI_5.1	46.3	1.26	1.82	0	48.34	5	1	0	0	5.16	2.31	0.17	1.8	6.31	8.01	1581.2	83.66		SMI_5.1	57.16	1.33	1.67	0	49.2	5	1	0	0	5.24	2.33	0.23	3	5.89	5.75	284.67	43.9
SMI_7.1	45.54	1.33	1.83	0	54.38	5	1	0	0	4.91	2.91	0.2	0	7	8.35	2197.6	91.88		SMI_7.1	59.34	1.38	1.88	0	51.69	5	1	0	0	5.16	3.03	0.23	1.4	6.85	7.1	901.2	45.58
SMI_7.2	46.58	1.36	1.9	0	51.92	5	1	0	0	4.94	2.93	0.31	0	6.76	7.45	2495.6	89.04		SMI_7.2	55.84	1.45	1.91	0	52.76	5	1	0	0	5.2	2.66	0.23	0	7.06	9.27	976.6	55.88
SMI_7.5	47.38	1.34	1.91	0	57.7	5	1	0	0	5.24	2.47	0.15	0.6	6.74	9.64	2403.4	83.99		SMI_7.5	60.2	1.39	1.72	0	52.94	5	1	0	0	4.73	2.43	0.31	0.8	6.15	7.89	231.2	50.21
SMI_8.1	59.93	1.45	2.11	0	51.28	5	1	0	0	4.53	3.24	0.38	1.5	6.64	4.5	2025.5	55.76		SMI_8.1	64.5	1.44	1.65	0	49.21	5	1	0	0	4.68	3.15	0.66	1.8	6.67	4.99	575	53.74
SMI_9.1	53.62	1.28	1.7	0	50.36	5	1	0	0	4.72	2.53	0.34	0	5.64	7.39	1849.2	80.69		SMI_9.1	64.94	1.32	1.73	0	48.17	5	1	0	0	4.83	2.19	0.48	0.6	5.55	6.78	731.4	52.56
SMI_10.1	43	1.3	1.7	0	51.64	5	1	0	0	4.6	2.83	0.28	0	7.06	7.63	2882.4	110.28		SMI_10.1	57.6	1.3	1.61	0	50.9	5	1	0	0	5.07	2.87	0.3	0.6	6.16	6.18	632	75.54
SMI_12.6	49.58	1.31	1.83	0	46.62	5	1	0	0	4.65	2.08	0.29	0	5.14	4.72	2169.6	57.5		SMI_12.6	65.3	1.43	1.76	0	49	5	1	0	0	5.25	2.36	0.4	0	4.97	4.25	593.4	30.91
AN-S-26	45.78	1.28	1.6	0	48.44	5	1	0	0	4.71	2.85	0.2	0	6.33	7.66	1919.4	73.1		AN-S-26	48.04	1.08	1.37	0	47.35	5	1	0	0	4.95	2.68	0.22	0	5.39	7.27	1429.2	64.58
MM577	35.24	0.87	2.25	9	55.49	5	5	1	1	3.58	1.76	0.6	5	1.23	1.92	28.4	3.73		MM577	47.34	0.89	1.83	9	48.75	5	5	1	1	3.85	1.87	0.69	5	na	na	na	na
Hybrid	51.2	1.47	3.84	9	69.92	7	1	5	5	5.08	2.65	0.7	9	3.37	2.69	932	17.08		Hybrid	71.54	1.36	3.32	9	54.01	7	1	5	5	5.35	2.51	0.76	9	na	na	na	na

## Sheet: _56F9DC9755BA473782653E2940F9
31VGvnOsH0CnrhmMO3LQxnokPbn_nB5DgnCW-Wn6frVUMzg3SjBYWVI4WUxNWkIzTTdKMDlCUlY0MS4u
Form1
{eae0ac76-8131-476a-b1ae-7d96e8bec46f}
